# Supplementary material
Source: PubMed Central journal article supplement (PMC4715949)

Suppl. Fig. 1 (Expanded Fig. 4)

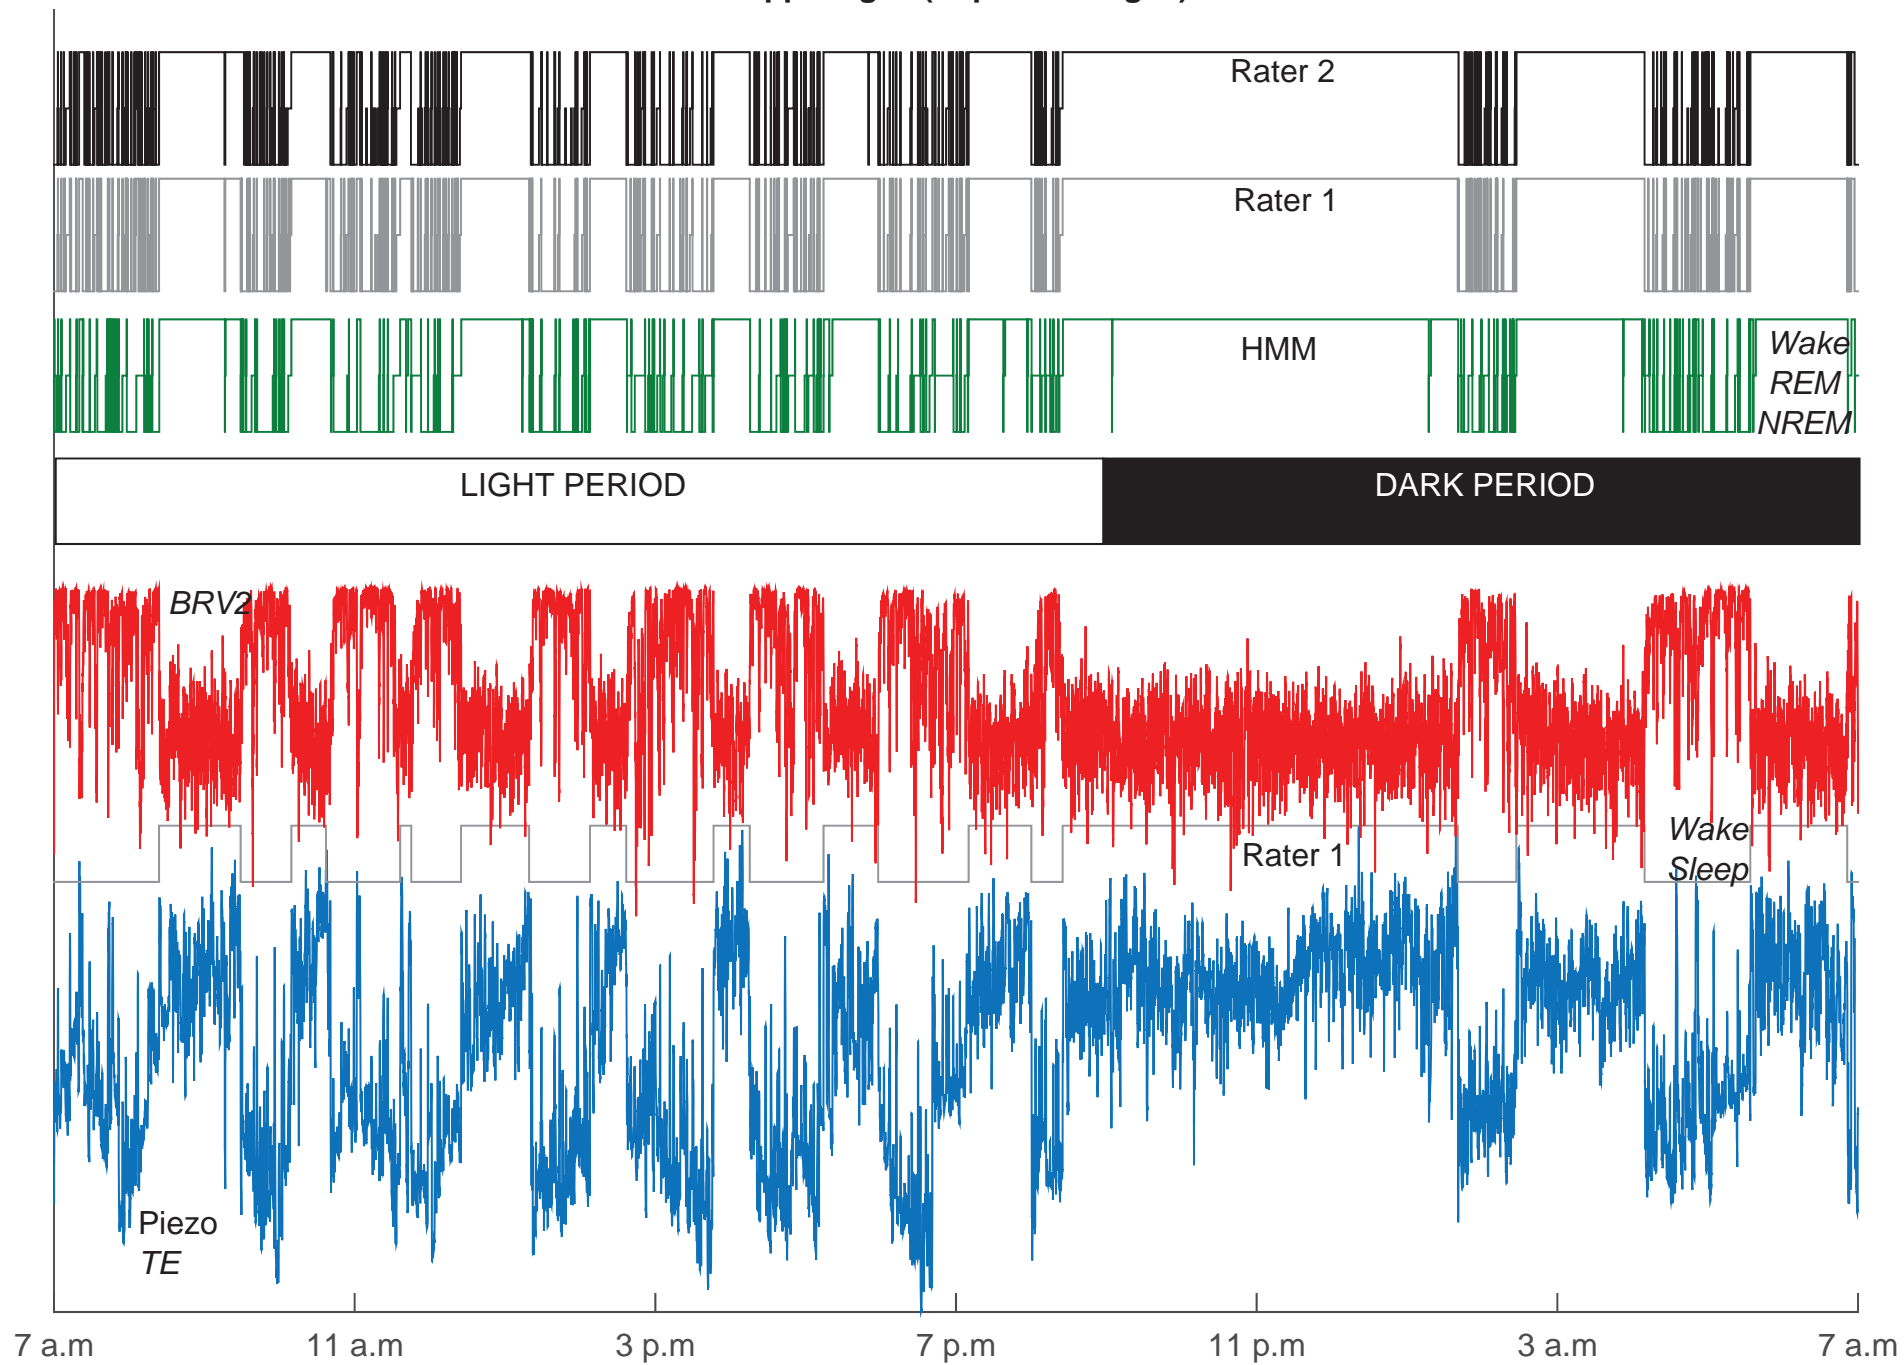

Supplement: NIHMS737902-supplement-Suppl__Figure_1.pdf [file NIHMS737902-supplement-Suppl__Figure_1.pdf]
